# Supplementary material for: Small RNA Bidirectional Crosstalk During the Interaction Between Wheat and Zymoseptoria tritici
Source: Front Plant Sci. 2020 Jan 8;10:1669. doi: 10.3389/fpls.2019.01669 (PMC6960233; doi:10.3389/fpls.2019.01669)
Supplement: Supplementary file 1 [file Table_1.xlsx]

## Sheet: fungi_srna
Major sequences of fungal predicted sRNA
>sRNA1
AAACUUUCAACAACGGAUC
>sRNA2
AACCUCCUCAGUAUACGUCGUCUCA
>sRNA3
AAGGACCUCGAGAACCCAA
>sRNA4
ACAUACGACCACAGAUAGAUG
>sRNA5
ACAUCGGGCUGCCUUGCGGAA
>sRNA6
ACGACAAGAACCAUGCAAA
>sRNA7
ACGCAGUCAUGAACGCCU
>sRNA8
ACGUUGCACAUGCCUGAUC
>sRNA9
ACUGAAAAGACCUGAGCGU
>sRNA10
ACUGUUUCGUCCCCUGUGGCGGUC
>sRNA11
ACUUGAUCUAAUCUGACA
>sRNA12
AGAAGGGAAACCAAGACAGUCUGGA
>sRNA13
AGAAGGGAAACUAAGACAGUCUGGA
>sRNA14
AGGACAUCUCUACCGGGAA
>sRNA15
AGGAGAACAAUGUAGCGAGCUU
>sRNA16
AGUCCUUCGGCAGAUUCUGCUU
>sRNA17
AUAACCCGGACGAUGCACA
>sRNA18
AUAAGAAGAAGAAGAAGAAGAAGA
>sRNA19
AUCGCAGAGCCAAGUUUCCUCA
>sRNA20
AUGAAUGAUGAUUAUUGCUGACC
>sRNA21
AUGAGAGCGAAGUGGGGAG
>sRNA22
AUGGCUGGAGGACUAGCAGG
>sRNA23
AUUAAAUCUUCUAAGCUCGA
>sRNA24
AUUCCCUUGACGCAGUGGC
>sRNA25
AUUCUUCUUCUUCUUCUUCUUCUU
>sRNA26
CAACAUGAUGAGCCGAACAUA
>sRNA27
CAAGGUGAAUCUCAUGGACGAGC
>sRNA28
CACACCCGACUCUGCAAGGCAC
>sRNA29
CACCCGGAAUGCAGGCUCUG
>sRNA30
CACCCGGGCUGAUGGAACGUU
>sRNA31
CACCGUCAACCUCUUGGA
>sRNA32
CACGUUGGAUUCCAGGCUUCA
>sRNA33
CAGCUGGGGCCUGAGCUCGCCU
>sRNA34
CAUCACAUCUGUUGCGGA
>sRNA35
CAUCAGCCGUCGGCAUCCA
>sRNA36
CAUCUUCGUUUCCACACCCGCA
>sRNA37
CCAGGACUGUGGGCGGUC
>sRNA38
CCCGCCUGGAGGACUCCA
>sRNA39
CCCGUAGAACCUGCUCUGUCUGCCA
>sRNA40
CCGCUCUCGCCCAGGGCACC
>sRNA41
CCUAAACCCUAAACCCUAAACCCU
>sRNA42
CCUCGGAAGGGAAACUAAGACAGU
>sRNA43
CCUCUGGCUGACGCGAACCUACCU
>sRNA44
CCUUCGGUAGAUUCUGCU
>sRNA45
CCUUGGUCAGCAGUGAGCUCA
>sRNA46
CGACGGCACUCUGACACCCA
>sRNA47
CGAGAUGCACUGCUAGGGCUA
>sRNA48
CGCCGCCGUCACCUUCCU
>sRNA49
CGGAAUGCGACUGUGUUC
>sRNA50
CGGACCGGCGACAAAUCA
>sRNA51
CGGAGCUGUGCGUUGGGCUC
>sRNA52
CGGAUCCCCACUUCGUUAUGGAUGA
>sRNA53
CGGUUGAACGCGGGUCUCC
>sRNA54
CGUGGAUCCGAACAGCAUGAAC
>sRNA55
CGUUCUUGGAGGAGGUCAUGGCU
>sRNA56
CGUUGAGACUGUUUCUCAC
>sRNA57
CUCAGCUGUCUGGCUCAGCGCCC
>sRNA58
CUCGGCAUGAUCUCAGCACCUA
>sRNA59
CUGCUGUGGAAUACCGAGAGA
>sRNA60
CUGGACUUGCUCCUGGACU
>sRNA61
GAAGACUCGGAGAACGACACCUU
>sRNA62
GAAGAUCAAGGGUAACGAAU
>sRNA63
GAAGCACUGAGAGCGGACUCAG
>sRNA64
GAAGGGAAACCAAGACAGUCUGGA
>sRNA65
GAAGGGAAACUAAGACAGUCUGGA
>sRNA66
GAAUCUGUGGCCUGGAUCC
>sRNA67
GAGCACGUCAGAGACAGA
>sRNA68
GAGGAACUUGAUGCACGCA
>sRNA69
GAGGGCAAUGAUCAACUGUACAGUC
>sRNA70
GAUCAUGUCGAGCGUUUGGCGAGCA
>sRNA71
GAUGAGGAGCGCCUUGCGCAAGCUG
>sRNA72
GCAAGAAGACCGGCGGCA
>sRNA73
GCAAUUCCGCGAUCGAGCAACCG
>sRNA74
GCAUUUCGUGCGACCACGUC
>sRNA75
GCCCAUGCGAUUGUCGUA
>sRNA76
GCCCGAUUGUCCGAAGGAGAACU
>sRNA77
GCUUCGUCGUCGCUGCUCA
>sRNA78
GGACAGGUGGCCGAGUGGUUAUGGC
>sRNA79
GGCAUGGAUCGUUCAAUC
>sRNA80
GGCCGACGAAGACUCUGACA
>sRNA81
GGCCGCAGCAACACUCGUUUGAU
>sRNA82
GUCGUCGUAGAGCCAAGUUUCCUCC
>sRNA83
GUCGUGACCGUCACUGGA
>sRNA84
GUCGUUGCAGAGCCAAGUUUCCUCC
>sRNA85
GUCGUUGCAGAGCUAAGUUUCCUCC
>sRNA86
GUGAGUGGCAGAACUGUUC
>sRNA87
GUUAGUUGGACGUGAGCCU
>sRNA88
UAAACGCAAGAUCUACGAAG
>sRNA89
UAAAGUGCUUCGGUUCGGAU
>sRNA90
UAAAUGGCACGUGUAGAACG
>sRNA91
UAACAAACGUCGUACUGGGA
>sRNA92
UAACAAACGUCGUGCUGGGA
>sRNA93
UAACAGCCUCUCCAAUCCU
>sRNA94
UAACAUCGGAGCAAAGGCCA
>sRNA95
UAACAUCGUCGGAGGUGCGA
>sRNA96
UAACAUGGAUGUCAGACGAGA
>sRNA97
UAACCGAAGAAAAUACCCGGA
>sRNA98
UAACCGGAUCUAGUAAGCGC
>sRNA99
UAACCGGUGUUGUAGUAUGCC
>sRNA100
UAACGAGGCCUAGGACCGCC
>sRNA101
UAACGCAAAGUUCGUCCUCC
>sRNA102
UAACGCUCUUAAUCUACGCCU
>sRNA103
UAACGUAGAGCGGCGUGUCU
>sRNA104
UAACUCGGAUUCUUGUAUAG
>sRNA105
UAACUGUAGACCGGGAGAAC
>sRNA106
UAAGAAAUUCGGAUAGAGCCU
>sRNA107
UAAGAACGCUGAAAUCCACG
>sRNA108
UAAGAAUAUCGUGUUGUACG
>sRNA109
UAAGACAGUCUGGAAGAAAC
>sRNA110
UAAGACAGUCUGGAAGAAACC
>sRNA111
UAAGACCGUCCGGUAGAGCU
>sRNA112
UAAGACGUACAAGAUGUAGU
>sRNA113
UAAGACUAUGUAGGACGGCU
>sRNA114
UAAGCAAUCCACAUUCCAGC
>sRNA115
UAAGCUUCGUAAAUUGUAACU
>sRNA116
UAAGCUUGUUGAGCUGGUU
>sRNA117
UAAGGACCUAGAACUACUUC
>sRNA118
UAAGGACGAGAUCUGAGAUCU
>sRNA119
UAAGGAGAACGGAGAAUGCC
>sRNA120
UAAGGCUUCGGUCGCGAGGC
>sRNA121
UAAGGGCAAGGCAGUAGAUC
>sRNA122
UAAGGUAGACUCUGUAGCCU
>sRNA123
UAAGUACACUACUAAGGACU
>sRNA124
UAAUACGCCUUUGUAGAACU
>sRNA125
UAAUACGCCUUUGUGGAACU
>sRNA126
UAAUAGUCCUCGGCGCUGCC
>sRNA127
UAAUAGUCGCUUGUGGUCCU
>sRNA128
UAAUAUGCCUUUGUGGAACU
>sRNA129
UAAUCCGUAGAUACUCUAUU
>sRNA130
UAAUCGGCCGGCGUUUUAGU
>sRNA131
UAAUCUAUGUACGGCUCGGU
>sRNA132
UAAUCUUCGUCGAGAUUCGCU
>sRNA133
UAAUGCGAUCUAGAGCUAGC
>sRNA134
UAAUGGACCGUAUACCCGAGA
>sRNA135
UAAUGGAUCGUUCUGGCACC
>sRNA136
UACAAGCUCGUCGUCGUGCU
>sRNA137
UACAAGCUUAGAACUUCUGCU
>sRNA138
UACACCCGAGCAGUCUGAAC
>sRNA139
UACACGAGGUCGAGCUGUCU
>sRNA140
UACAGACGUAGAAACCAUAGG
>sRNA141
UACAGCGUAGGCGCUCUGCU
>sRNA142
UACAGGGACUCCGGAAAUGC
>sRNA143
UACAGGUCUGAGAUUCGAAG
>sRNA144
UACAGUAGAGACUUCGAACU
>sRNA145
UACAGUGAUUCUCGUCGAUC
>sRNA146
UACCACUGUCUUGCUGCUUG
>sRNA147
UACCCGAUAAUAGGCUGAGA
>sRNA148
UACCCGGUUACGUAGGCCUA
>sRNA149
UACCCUCCCAUGACUGUGACU
>sRNA150
UACCCUGUUGUAACUCCCGA
>sRNA151
UACCGAACAAUUGAAAGACU
>sRNA152
UACCGAAGAACUUGUGACCU
>sRNA153
UACCGAGAAGCUGUACAAUC
>sRNA154
UACCGCACCUCAUACCUCAUA
>sRNA155
UACCGUCGGCAAGAACGAGA
>sRNA156
UACCGUCGUCGUCGUCAUGA
>sRNA157
UACCUGACUGUGCAGAUCGCC
>sRNA158
UACCUGAGGCGAUCGUCGUG
>sRNA159
UACCUGGUUGAUUCUGCC
>sRNA160
UACCUGUCGCUGUAAUGCCU
>sRNA161
UACCUUACCCGAGUCGGAGA
>sRNA162
UACCUUACUGAACAUUACACC
>sRNA163
UACCUUAUCUACUCUAUGUCU
>sRNA164
UACCUUGUUCGAGAUCUGUC
>sRNA165
UACGAACGAUCGUUACGCCU
>sRNA166
UACGAAUAGACAGACACACU
>sRNA167
UACGAGAAGUACUGUAAGACA
>sRNA168
UACGAGACAUUGACCGCCU
>sRNA169
UACGAGAGCUCUGUGUUUCU
>sRNA170
UACGAGAGGUCGCUCAGAGC
>sRNA171
UACGAGAUACGCCGGAAUGC
>sRNA172
UACGAGAUCGAACAAAUGGA
>sRNA173
UACGAGAUCGUAGACACGGC
>sRNA174
UACGAUCUUCCACCUUCGGC
>sRNA175
UACGCAGAGGAGGAAUUCUG
>sRNA176
UACGCCGCACGUUCGUGCUG
>sRNA177
UACGCUACGAACGAGAACGAGAA
>sRNA178
UACGGAAGCACACUAGAAACU
>sRNA179
UACGGCAUCUCAUUCGGAGG
>sRNA180
UACGGGUAGAGCUCGGCCU
>sRNA181
UACGUCGACUUAAUUAAACCU
>sRNA182
UACGUGAGACUUGGAGCCU
>sRNA183
UACUAGAUACUGGAUACGACU
>sRNA184
UACUAGGUACUUAGAGCUCG
>sRNA185
UACUAUUGUUCUGUGCUUGU
>sRNA186
UACUAUUGUUCUGUUGUAGC
>sRNA187
UACUCACCUGAUCGCGGCAGG
>sRNA188
UACUCAGGACAGUGUGCACU
>sRNA189
UACUCGAGACGAUUGUGCCU
>sRNA190
UACUCGCUCGGGGUUCGGAU
>sRNA191
UACUGUACACCGUCUUGAACG
>sRNA192
UACUGUGUAACAUCUCGCCU
>sRNA193
UACUGUUGUUCUGUGCUUGU
>sRNA194
UACUUGUAGCUCUAGCACUCG
>sRNA195
UAGAAAACUCUUCGCCUUGG
>sRNA196
UAGAAAUAUUUUCUCGGGCC
>sRNA197
UAGAACAAAACCGAUGGCCC
>sRNA198
UAGAACCCCUGACCCCGAGC
>sRNA199
UAGAACCUCGACGUCGUCG
>sRNA200
UAGAAGUCGGACCAAGAGCCU
>sRNA201
UAGAAGUCGGUGAACAUCUCU
>sRNA202
UAGAAGUCGUGCACUUAGCCU
>sRNA203
UAGACAGACACACUGGCCCU
>sRNA204
UAGACCGGGAGAACUCCAUG
>sRNA205
UAGACCGGGAGAACUCUAUG
>sRNA206
UAGACGUAGAAUUCCGACUUA
>sRNA207
UAGACUAGUAUUUCGAAACU
>sRNA208
UAGACUAUCUUUAGAGGACU
>sRNA209
UAGACUGCUCGCCUAGGCAUC
>sRNA210
UAGAGAACGCUUUGCCCGAG
>sRNA211
UAGAGACUUCGAACUAUUCG
>sRNA212
UAGAGAUCGAAUCGUCCUGCC
>sRNA213
UAGAGAUUGUACCGAAGUCG
>sRNA214
UAGAGGACCCGAAUCUCUAGA
>sRNA215
UAGAGGACGAACUUUGCGUU
>sRNA216
UAGAGGACUCUCUCUGGCACA
>sRNA217
UAGAGGCUCUGGCUUGGCAUG
>sRNA218
UAGAGUAUCUACGGAUUAACU
>sRNA219
UAGAGUGAUUGAUUGAAGAAC
>sRNA220
UAGAGUUCGGCGUCGCCGGC
>sRNA221
UAGAGUUGUAGAUUCCACC
>sRNA222
UAGAUAGAACAUCGUACGCCU
>sRNA223
UAGAUAGCGUCGAGAGAAGA
>sRNA224
UAGAUAGCGUCGAGAGAAGAC
>sRNA225
UAGAUCUUGCGUUUAAGGACC
>sRNA226
UAGAUUAUCUUUAGAGGACU
>sRNA227
UAGAUUCUACCGACUGUUCU
>sRNA228
UAGAUUGUUCCACUUUGACG
>sRNA229
UAGCAACGGCGGGCUCUGCC
>sRNA230
UAGCAGACGACGAAGAGGACU
>sRNA231
UAGCAUCGAGAUAAGGACGA
>sRNA232
UAGCAUCGUCGAUGAGACUA
>sRNA233
UAGCCGCGGAUAGGUUCUCG
>sRNA234
UAGCCGUCGGUUGUCCGAGC
>sRNA235
UAGCGAGAUCGGACGAACGUU
>sRNA236
UAGCGAGUUGUCGAAAGAGCC
>sRNA237
UAGCGAUCGUCGUCGUCUACU
>sRNA238
UAGCGAUCGUCGUUGUCUACU
>sRNA239
UAGCGAUCGUUGUCGUCUACU
>sRNA240
UAGCGCAGGAACCGCUGGAC
>sRNA241
UAGCGGACAAAGUAGUAGUC
>sRNA242
UAGCUAUGUGAUCUCGCACC
>sRNA243
UAGCUAUUAGUAGGUACGGC
>sRNA244
UAGCUCGAGGAUCGUCUACG
>sRNA245
UAGCUGUAAGUCCUAUCGCCG
>sRNA246
UAGCUUUCGAAGUGGAGGGC
>sRNA247
UAGGACAGAGUAGACUGCCU
>sRNA248
UAGGACAGAGUGGACUGCCU
>sRNA249
UAGGACGGCCUUGCCCUAAG
>sRNA250
UAGGACUAAUUGGCGCACCG
>sRNA251
UAGGACUAGCAUUUCCGAGAA
>sRNA252
UAGGACUCGCCUCUGCGCGUC
>sRNA253
UAGGACUGCCAUCUUCCUAGG
>sRNA254
UAGGAGGAACUCCGGCACC
>sRNA255
UAGGAUAGAGUAGACUGCCU
>sRNA256
UAGGAUAGAGUGGACUGCCU
>sRNA257
UAGGAUCCAGGUCUUACGGAU
>sRNA258
UAGGAUCCCUCUGAACGCCU
>sRNA259
UAGGAUGUAAAGUGGCUCC
>sRNA260
UAGGAUUGGAUGUAUUAACAUC
>sRNA261
UAGGCAAUUACAAGAAGAACU
>sRNA262
UAGGCAUCGCUCCGAGCGG
>sRNA263
UAGGCAUCGCUCUGAGCGA
>sRNA264
UAGGCCUCUGAAAUGCACACU
>sRNA265
UAGGCGGAAUUAUUGUAGAUC
>sRNA266
UAGGCGUCCGAUUAGUAGGA
>sRNA267
UAGGCGUCGUAUAACAGGACG
>sRNA268
UAGGGAGUCCGGCAGAGGUU
>sRNA269
UAGGGAUAUGCGAUUUCGAU
>sRNA270
UAGGGUACUCGGAUUUAGAC
>sRNA271
UAGGUCCUCGGUUCCGGUAA
>sRNA272
UAGGUGAAACCUCGUCUAGAG
>sRNA273
UAGUAAGUCUGACUUAAGCU
>sRNA274
UAGUACUUCUAGGUAGGUCU
>sRNA275
UAGUAGAAACUCUAUAGCGCC
>sRNA276
UAGUAGAAAUUCUAUAGCACC
>sRNA277
UAGUAGAAUGUAGGCACGGA
>sRNA278
UAGUAGAGCUCUGGCUUUAUA
>sRNA279
UAGUAUAGGGAGUUAUAGUG
>sRNA280
UAGUAUGACCGAGCGGCUC
>sRNA281
UAGUCAAAGGUAGUCUACUU
>sRNA282
UAGUCCAAUUCGUUGUUGGC
>sRNA283
UAGUCCGCCGUUAGACGUGC
>sRNA284
UAGUCGACCAAAGUGCUGCC
>sRNA285
UAGUCUACCUUUGCACCUGA
>sRNA286
UAGUCUAGGAAUUGCGGGC
>sRNA287
UAGUGAAAUGCCAACAGGACU
>sRNA288
UAGUGAGAAGAAUGGCAACAU
>sRNA289
UAGUGCUUAUAGGAGGAU
>sRNA290
UAGUUAAUCCGUAGAUACUCU
>sRNA291
UAGUUCGUAGCGUAGGCUAUU
>sRNA292
UAGUUCUAUAAGACCCGAGA
>sRNA293
UAUAACAGCUCUGGAGGAGA
>sRNA294
UAUAACUCGGAUUCUUGUAU
>sRNA295
UAUACUACUGUAGACCGAGG
>sRNA296
UAUACUAGUCUAUAAGUGCU
>sRNA297
UAUACUCUAGAACUACUAGCU
>sRNA298
UAUACUGUUGAAAAUGGACU
>sRNA299
UAUACUUGAUCGUUGGUCAUG
>sRNA300
UAUACUUUCAGAACCCAACU
>sRNA301
UAUAGCCUUAGAGCUCGACC
>sRNA302
UAUAGGACAGAGUAGACUGCC
>sRNA303
UAUAGGACUAUACUAAGCGCC
>sRNA304
UAUAGGGCAGAGUAGACUGC
>sRNA305
UAUAGUAGGUUUGGAGUACU
>sRNA306
UAUAGUUGUAGCUUGUAGCU
>sRNA307
UAUAGUUUCGGGUAUAGCUU
>sRNA308
UAUAUACUUCCUUCGAGGGC
>sRNA309
UAUAUGCGCAUCUGCAGAGC
>sRNA310
UAUCAUCUCUGGAGGCAUCCG
>sRNA311
UAUCAUGUCUUCGUUGUACG
>sRNA312
UAUCCGAAAAGUCGUCCUCG
>sRNA313
UAUCCGGAAUAGAACUUAGCU
>sRNA314
UAUCCUCGGACUGACCGGUC
>sRNA315
UAUCGAAAGUAGUAGGUACU
>sRNA316
UAUCGAAGAUCAGGAGAAGU
>sRNA317
UAUCGAGACGCGAAUAGAGA
>sRNA318
UAUCGCUUCUAGGUAGGUCU
>sRNA319
UAUCGUCUACAUCGUUAGGC
>sRNA320
UAUCGUGAGAAGGGUAGACU
>sRNA321
UAUCUAGCCUAACGUAGAGC
>sRNA322
UAUCUUCCUGGGACUGCUAUC
>sRNA323
UAUGACACUUUACUCUGCACC
>sRNA324
UAUGAGUGUAGUCGUAUGAG
>sRNA325
UAUGGAACCGAAUCUGGAUU
>sRNA326
UAUGGACACGAGGACUCUCG
>sRNA327
UAUGGACUAUCAGGAGGGGA
>sRNA328
UAUGGACUCCAUAGUGGAAUC
>sRNA329
UAUGUAGAAUCUUAUAGCACC
>sRNA330
UAUGUAGGACGGCUUUGCCC
>sRNA331
UAUGUCGGAACUGCACCUAAG
>sRNA332
UAUGUCGUGCAUGGUAGCCU
>sRNA333
UAUGUCUAUGUUAGCUGCCU
>sRNA334
UAUUAAGAGUAGUAGAACACU
>sRNA335
UAUUAGAGGAUCCUGAGACG
>sRNA336
UAUUAGAUUUACUAAGGACU
>sRNA337
UAUUAGUAGUAUCUCGCACC
>sRNA338
UAUUCGCGGUCGAAGCGACU
>sRNA339
UAUUCUUCUAGAACUAAGCCU
>sRNA340
UAUUGGCACCCUCUGAGUAAU
>sRNA341
UCAAAGAUCUGACACCGGGA
>sRNA342
UCAAAGUUCGUUGAAUAGCC
>sRNA343
UCAAAUAUCGUCCCCGGGGC
>sRNA344
UCAACCACGAUAUCGGCUCG
>sRNA345
UCAACGAGAACAUGAGCAGCA
>sRNA346
UCAACUGGCUGUAUAACGCACC
>sRNA347
UCAAGCUCAACAGUCUGACU
>sRNA348
UCAAGGUACUGUACAGGAACU
>sRNA349
UCAAGGUCGUCGUCACGAUC
>sRNA350
UCAAGUAAGCAGACGUCGUC
>sRNA351
UCAAGUCAAUCCCUCGCGCC
>sRNA352
UCAAUGUUCGACUCAGAGACU
>sRNA353
UCACACGAGAACAUCUGAACU
>sRNA354
UCACAGGAAGUAGACAAACC
>sRNA355
UCACAUGACUCGGAUUCUUG
>sRNA356
UCACCGGACCCGGAACACCGCCA
>sRNA357
UCACGAACUUUGCGGACUCG
>sRNA358
UCACGCUCGCUCAGGACGCG
>sRNA359
UCACGCUCUAGUCAAGGUCG
>sRNA360
UCACGGCAGUCCUCAGAGCAC
>sRNA361
UCACGGCGUCGUCUGGGGAU
>sRNA362
UCACGUACGUCUGAUUUGCG
>sRNA363
UCAGACCUCAAGACUCGCCU
>sRNA364
UCAGAGGAGCCGGACAGGUC
>sRNA365
UCAGCAAGGUCAAAGACUGC
>sRNA366
UCAGCACUGAUGAUUUCGGC
>sRNA367
UCAGCCUGAAUCUGAAGCCU
>sRNA368
UCAGCGACUGAUGGACUUGG
>sRNA369
UCAGGACAGUCAAAGCUCGCC
>sRNA370
UCAGGCAGCCGGAGUAGAACA
>sRNA371
UCAGGUAUGUCAAGGGCGAC
>sRNA372
UCAUCCGCCCGAAACUGUAAC
>sRNA373
UCAUCGAGGCUGAACAUGCCU
>sRNA374
UCAUCGAUCGGGCGACCGGU
>sRNA375
UCAUGAUCGACUGAAGAGUC
>sRNA376
UCAUGCUGGUCGAGCUGACU
>sRNA377
UCAUUUCGUGCGACCACGUC
>sRNA378
UCCAACGUCGCCUUGUACCUC
>sRNA379
UCCAGAGCUGUCCUCGAGCUG
>sRNA380
UCCAGAUCGUCAGCGGCCU
>sRNA381
UCCAGCGAUCGUCGUCGUC
>sRNA382
UCCAGUGCGGACUGUACGUAC
>sRNA383
UCCAUGAUCGUCUCGGCGAUG
>sRNA384
UCCAUUGGAUGACACUGGCCU
>sRNA385
UCCAUUUCGUUCGUCGCGACU
>sRNA386
UCCGAAGACUGUCCGAACCA
>sRNA387
UCCGAAGGAGAUAACGAUGAC
>sRNA388
UCCGAGAAUGGGCUGUCC
>sRNA389
UCCGAGAUAGUAGAACUCUA
>sRNA390
UCCGAUCUCGAUAGACGAGU
>sRNA391
UCCGCUCGGAUCUUGGAACC
>sRNA392
UCCGGAAAGAGACUCGGUCU
>sRNA393
UCCGGAGGAAACUUGGCUCU
>sRNA394
UCCGUUUGUCGAUCCGACCA
>sRNA395
UCCUACUCAUCGGACGGAGCC
>sRNA396
UCGAAAUAUCGCGACAUACG
>sRNA397
UCGAACUGUGACCACAGGCCU
>sRNA398
UCGAAGUCUGUUGAAUCUACGGC
>sRNA399
UCGACAUAUCUUGGACGCCU
>sRNA400
UCGACCACUUGCCGAAGGCUG
>sRNA401
UCGACGUUCGUCAAGGAUGU
>sRNA402
UCGACUGUCGAUAGCGCCACU
>sRNA403
UCGAGAACAUCCUGAGCACC
>sRNA404
UCGAGAAGGAUUUUGGACGGA
>sRNA405
UCGAGAAGGAUUUUGGGCG
>sRNA406
UCGAGAAUUCGUCGAUACCUG
>sRNA407
UCGAGAGGCUAGGACUUUUG
>sRNA408
UCGAGAUCGCGACAUGGCGC
>sRNA409
UCGAGAUGCUGUAGCUGCAGA
>sRNA410
UCGAGAUGGACUGUCACUCC
>sRNA411
UCGAGGACUUGAAUCGACCU
>sRNA412
UCGAGGUUCGUCGCUUGAUC
>sRNA413
UCGAUCCAGAUCUUCUUUUG
>sRNA414
UCGAUGUCGAGCUUUGGAAG
>sRNA415
UCGCAGAGUUGUAGAUUUCA
>sRNA416
UCGCAUACAUCUUCGGCGGU
>sRNA417
UCGCAUCGUGGAGACACGUG
>sRNA418
UCGGAAACCGUUGUAGGACG
>sRNA419
UCGGAAGUAGUAGGUACUUC
>sRNA420
UCGGACCAACGCCCCCCGGGG
>sRNA421
UCGGACUGACCGGUCUGCCU
>sRNA422
UCGGACUUAGGCGAACGGAA
>sRNA423
UCGGAGAACUCUCAAGCACCAGAGA
>sRNA424
UCGGAUCGAGAAUGCUGUGA
>sRNA425
UCGGAUUCGACCACGUCGGAUUA
>sRNA426
UCGGCGCCGGUCAUGUAGGC
>sRNA427
UCGGCGCCGGUCAUGUAGGCG
>sRNA428
UCGGGCACGCGAGUCGGGCU
>sRNA429
UCGGGGUCACACGAAGCACC
>sRNA430
UCGGUCAAGAACGACGCCU
>sRNA431
UCGGUCGCGAGGCCAGGACU
>sRNA432
UCGGUCGGGAGCACUCGAGA
>sRNA433
UCGGUUACCCCGCUCUGCCC
>sRNA434
UCGUUCCUCCUGGCUGUAC
>sRNA435
UCUACAAUCUCGUACUCUACG
>sRNA436
UCUAUAUCGUCUAUAGGCUU
>sRNA437
UCUAUGUCCUUUAGAAUGCCU
>sRNA438
UCUUAUGUGUCCAUGUUAGC
>sRNA439
UCUUAUGUGUCCAUGUUAGCU
>sRNA440
UCUUAUGUGUCUAUGUUAGCU
>sRNA441
UCUUCGGGCUCGCUCGGACU
>sRNA442
UCUUGGAACCUGAACGCGCCU
>sRNA443
UGAAAGACGUAACAAACGGCU
>sRNA444
UGAAAGCUUUCGUCGAGGGC
>sRNA445
UGAAAUCUGGUACUUCCUCG
>sRNA446
UGAACACAUCACUCCUUG
>sRNA447
UGAACACGAUUGACGGAUCG
>sRNA448
UGAACAGAUCGUGGAGGAUC
>sRNA449
UGAACUGCUCGCCUAGGCAUC
>sRNA450
UGAAGAACUUCGCCGAGGAU
>sRNA451
UGAAGAGAUCUCGGGCACCG
>sRNA452
UGAAGGAUUCGAUGCUCUGCA
>sRNA453
UGAAGGCAGUCGUAGUCGGC
>sRNA454
UGAAGGUCUGGAAGUCGCCU
>sRNA455
UGAAUCGGACCGGAGACGUC
>sRNA456
UGAAUGCAUUUCGUCGAUUC
>sRNA457
UGAAUGCCUGGCACAUCACCG
>sRNA458
UGAAUUGUAGAUUGGGGACU
>sRNA459
UGACAGAUCUUACAGGGCCC
>sRNA460
UGACAGCGGACUGGCGUUGU
>sRNA461
UGACAUCGAGAAACGGACAA
>sRNA462
UGACAUCGAGAAACGGACAAA
>sRNA463
UGACAUGUUAGAAUAACGCCU
>sRNA464
UGACCGGACCAUGAAAGCUG
>sRNA465
UGACCGGACUUCAUGCUUGAA
>sRNA466
UGACGAAGUCUCUAGAGAAGG
>sRNA467
UGACGAGAUCCACGAGACUG
>sRNA468
UGACGCAGUCUAUUAUGCUG
>sRNA469
UGACGGACAGAAGUGGCGCC
>sRNA470
UGACGUAGAGCGACGUGUCU
>sRNA471
UGACUACUGCUUUGUCCGCC
>sRNA472
UGACUGCCGAAUUCCUAGCCU
>sRNA473
UGACUGUUCCAACUCCGGCA
>sRNA474
UGAGAAUCCUUCGGGCGGGA
>sRNA475
UGAGAGAAUUCAGCACGCCU
>sRNA476
UGAGCAUCGUCAAGGCAUC
>sRNA477
UGAGGAACAAUGCUGAAUGC
>sRNA478
UGAGGACAGUUUGACCGAUC
>sRNA479
UGAGGGUCUGGCUGAGCUCU
>sRNA480
UGAGGUAGAAUUCUUUGACC
>sRNA481
UGAGGUUGUCACGAACGCUU
>sRNA482
UGAGUGUACUCUGAUGACAUC
>sRNA483
UGAUACCGGACUGUGAUCGUA
>sRNA484
UGAUACGAGAUACGCCGGAAU
>sRNA485
UGAUCGACUCAGAACAACGCCU
>sRNA486
UGAUUCGCGCUUUGAUUCGCC
>sRNA487
UGAUUGAAGAACUAACUAACU
>sRNA488
UGAUUGAGAAACUCAUGCCU
>sRNA489
UGAUUGAUUGAAGAACUAACU
>sRNA490
UGCAAAGACCGCUUUUGGACU
>sRNA491
UGCAAAGAUGCGACGGCGCU
>sRNA492
UGCAAGAAUUGACGUAGAACG
>sRNA493
UGCACACAUCGUCUGGGGACA
>sRNA494
UGCACCCAUUGGAAUCGGACU
>sRNA495
UGCACGAGUCGCUUGUCGGC
>sRNA496
UGCACGGCACCGCAGCUACUC
>sRNA497
UGCACGUAGAAUGUCUUGGC
>sRNA498
UGCACUUUUCCGUAGAGGAC
>sRNA499
UGCAGGACAGAUGACAGCCU
>sRNA500
UGCAGUAGACUCCACCGAGAA
>sRNA501
UGCAGUCGUUGGCUGGUCU
>sRNA502
UGCAUCGAGCCGUCUGUGACA
>sRNA503
UGCAUCGGACUCGUGCACGCC
>sRNA504
UGCAUCGGAUCCGGACUGCC
>sRNA505
UGCAUGCCGGGCUGUUGGCCA
>sRNA506
UGCAUGUCCAUCGUUCGACU
>sRNA507
UGCAUUGUAACCGUCGCUGC
>sRNA508
UGCCCGCGGACAUAUUCUCG
>sRNA509
UGCCCGGGACUGUGAGCACA
>sRNA510
UGCCGAGACUCGAACAGCACC
>sRNA511
UGCCGGAAUGGUACUUCGCCU
>sRNA512
UGCCGUUGUUCUGUUGUAGC
>sRNA513
UGCCUGGAGACUCAGUGAAGA
>sRNA514
UGCGAAUGAUCACGUCGACU
>sRNA515
UGCGACUUCACUUCUGGCCU
>sRNA516
UGCGAGAAUUCUGUACGGGG
>sRNA517
UGCGAGCGAUCGUGGCAACG
>sRNA518
UGCGCAAGCGGUAAGCGACCG
>sRNA519
UGCGCAAGUCGACACGACGCG
>sRNA520
UGCGCACCGGAUUCGAGACUC
>sRNA521
UGCGCAGAUCUCGUUCGCCU
>sRNA522
UGCGCAUCGUCGAGCCUGGC
>sRNA523
UGCGUCAAGGUCGGAUCGGG
>sRNA524
UGCGUUGGACGUAGACCGAGA
>sRNA525
UGCUGUUGUUCUGUAGCU
>sRNA526
UGGACCAGACUGUUACAUGU
>sRNA527
UGGAUCAGGUCUGGAUGACU
>sRNA528
UGGAUUGUCUGGGCACGAGA
>sRNA529
UGGCAACCAUGUCGGUGUACU
>sRNA530
UGGCACAGGUCUGACGCCUG
>sRNA531
UGGCCGAGGAACUUUCUGAAG
>sRNA532
UGGCCUGCCGUCGAGAUCAC
>sRNA533
UGGCUGGAAGACAUGAAAUGA
>sRNA534
UGGCUUCGAGACUUUGACAA
>sRNA535
UGGUACUGAAUGCCUUGGGC
>sRNA536
UGGUCAGGAACAUGAUGCCU
>sRNA537
UGGUGCUGGAGAAUGUCGUC
>sRNA538
UGGUUCGAUCUUUGCGGAC
>sRNA539
UGUAAGAUCGCCACGGCAACG
>sRNA540
UGUACAAAACCUGGACCCCG
>sRNA541
UGUACAUUAGUGAUCCUACUG
>sRNA542
UGUACCGAAUCUACAGAGCCU
>sRNA543
UGUACUGCGUGCUCUUGGAC
>sRNA544
UGUAGACCGGGAGAACUCCA
>sRNA545
UGUAGCUUGUGUUUCGAGGC
>sRNA546
UGUAGGAGUGUAGUCGUAGU
>sRNA547
UGUAGUUCCUGGACGUCGCCU
>sRNA548
UGUAUUCCGCUUCGACUGUUG
>sRNA549
UGUCACCAGCCCAGUCGGCA
>sRNA550
UGUCCCAGGUCGGAUUGGCC
>sRNA551
UGUCGAGGAUCCAGAGGGUG
>sRNA552
UGUCGUCGUCGUCAAGAUGA
>sRNA553
UGUCGUUGUCUUGGACCUCG
>sRNA554
UGUCUUCUGUUCUGACGAACC
>sRNA555
UGUGAUUGAGAACAGCAUCCC
>sRNA556
UGUGCAGGUGGUCGAGUCUG
>sRNA557
UGUGCGGCUGUAGUCUCACG
>sRNA558
UGUGGAACUAUAUGCCGCCU
>sRNA559
UGUGGCAACGUAGAACUGUC
>sRNA560
UGUGUCCUCAGAUCAGUCGCC
>sRNA561
UGUUAGAACGUCGUUCGCCU
>sRNA562
UGUUCCUGUGGAACUUCCGCC
>sRNA563
UGUUCGCAACGUAGAGGGCU
>sRNA564
UGUUCGCAGCGUAGAGGGCUG
>sRNA565
UGUUCGGACAAACUUGGCAUU
>sRNA566
UGUUCGGUAGAGCUCUGUCCU
>sRNA567
UGUUCUGGAUUGAACCGGGA
>sRNA568
UGUUGAGAUUCCGAUCGGUC
>sRNA569
UGUUGUAGAACCGGACAAUG
>sRNA570
UGUUGUAGAAUGGCAUCCGU
>sRNA571
UGUUGUUCUGUAGCUUGUGU
>sRNA572
UGUUGUUCUGUGUCUUGGACG
>sRNA573
UGUUUGUAUCCUUUGACAACC
>sRNA574
UUACGCGAGGAUUAAGAACG
>sRNA575
UUAGACUGUCUCGCAUGAGA
>sRNA576
UUAGAGAUUCCGAUAGCACUC
>sRNA577
UUAGAGUAGAAGAUCUGCCU
>sRNA578
UUAUAGAUUCCACCGACUGU
>sRNA579
UUAUGGAUUCCACCAACUGU
>sRNA580
UUAUUACCGAGUAAGCACC
>sRNA581
UUCAAGGACGACUUUGUACCU
>sRNA582
UUCACGGAUGAACCAGAGAUCA
>sRNA583
UUCAUGCGGCUGUUCAACGUA
>sRNA584
UUCCAACUCUGCACGGACAGC
>sRNA585
UUCCACCUGUCUCGUCAGACG
>sRNA586
UUCCAGGUCUCGGAAGCGACG
>sRNA587
UUCCAGUGCGUCGACGUGUC
>sRNA588
UUCCAUCGUUCCGAAGAACU
>sRNA589
UUCCCGAGACAUGAUCGUCAUG
>sRNA590
UUCCGAGCUGCGUUCUCUCGCU
>sRNA591
UUCCGGACUGGAGAUGGUCA
>sRNA592
UUCCUUUGUCUCGCAUUUGU
>sRNA593
UUCGAAGUGUCGUCUGGCCU
>sRNA594
UUCGACGGUCUUCGGACGGU
>sRNA595
UUCGCAGUCGAUGAUGUACC
>sRNA596
UUCGGACGAGGAUGAUGACU
>sRNA597
UUCGUAGCGUAGAGGGCUA
>sRNA598
UUCGUAGCGUAGAGGGCUG
>sRNA599
UUCGUGAUAGCACUCUGCACC
>sRNA600
UUCUACGUGAGCGCCGGGGC
>sRNA601
UUCUACUAUCUCGGACAUAG
>sRNA602
UUCUCGACUGGAAGAGGCCU
>sRNA603
UUCUGGACUGAGCCUUGGAC
>sRNA604
UUGAGGAUCUGUAUCAUAACU
>sRNA605
UUGAUCAGUCGUCGCACGGC
>sRNA606
UUGCAUGGCACAAAGCGGGC
>sRNA607
UUGCCGUCGGCCUCAUGAACU
>sRNA608
UUGGACAGCUGCUUUUGCACU
>sRNA609
UUGGACCUAUACAGAUCAGCC
>sRNA610
UUGGACUCAAUGACCAAGGCU
>sRNA611
UUGGAUAGUGAGCCUUGGUC
>sRNA612
UUGGAUUCAUGGAUAUGCACU
>sRNA613
UUGGAUUGAGCCUUGGCGGG
>sRNA614
UUGGCAAGAGCACGAUCGUCG
>sRNA615
UUGGCACAUCGCAGUGGACG
>sRNA616
UUGGCCGAGGUAGAUCUUUC
>sRNA617
UUGGCGUCGAGAGCUGGAC
>sRNA618
UUGGCUUCCUUGUCAUGAUCG
>sRNA619
UUGUAGAACAAUGUCGCACC
>sRNA620
UUGUAGAUUCCACCGACUGU
>sRNA621
UUGUGGAUUCCACCGACUGU
>sRNA622
UUUAAGAAUGGACAGUACGCC
>sRNA623
UUUAAGGCUCUCCUAGAACU
>sRNA624
UUUACAUCCUACUCAUCGGA
>sRNA625
UUUACCGGAGCAGAUAGAUC
>sRNA626
UUUACGUCCUACUCAUCGGA
>sRNA627
UUUAGAUCCGGAUUAUAGUC
>sRNA628
UUUAGGCUUGGCACUGUAUAG
>sRNA629
UUUAUCCUUCGCGGUGCCCG
>sRNA630
UUUAUCGGCUGCCGGAGCUGA
>sRNA631
UUUCAGGAUUGUGCAGGCCU
>sRNA632
UUUCAUUGCAUCCUCGCGCCU
>sRNA633
UUUCGAGAAGGAUUUUAGGC
>sRNA634
UUUCGAGAAGGAUUUUGGGC
>sRNA635
UUUCGAUGGAGACUCGGCCU
>sRNA636
UUUCGCGAUCGAGGAUGUCG
>sRNA637
UUUCGGAACAGAGUUCGCUC
>sRNA638
UUUCGGUUCGGAUUUCGAGA
>sRNA639
UUUCGUACGACCAUGUUAGGA
>sRNA640
UUUCGUACGACUAUGUUAGGA
>sRNA641
UUUCUGUGUGACCUGGUUC
>sRNA642
UUUCUUAAUACGUAUGCGACU
>sRNA643
UUUGAACAGAUGAACCCGGA
>sRNA644
UUUGAGACGGCGAGGUAGAA
>sRNA645
UUUGAGACGGCGAGGUAGCA
>sRNA646
UUUGAUCGUUAUCAUAGCCU
>sRNA647
UUUGCACCUGAUCUGAACUGA
>sRNA648
UUUGGAACUUUAGACGAGAA
>sRNA649
UUUGGUCGUCGAGAAUUUCC
>sRNA650
UUUGUAGAACUACAUGCCGCU
>sRNA651
UUUGUAGAACUAUAUGCCGCU
>sRNA652
UUUGUAGAACUGCAUGCCGCU
>sRNA653
UUUGUAGAACUGUAUGCCGCU
>sRNA654
UUUGUCUUUGUUGGACGGCU
>sRNA655
UUUGUGGAACGCGACCGAGA
>sRNA656
UUUGUGGAACUGUAUACCGCU
>sRNA657
UUUGUUUGACGGAAAGCGCCU
>sRNA658
UUUUACCGGCAAGUUGCGCG
>sRNA659
UUUUCACAAUGUCGAUGUUG
>sRNA660
UUUUCGACAAGGACGGAAUC
>sRNA661
UUUUGCCGUCGUCAAGCGAUG
>sRNA662
UUUUGUCCAGAAGUACUGUC
