# Supplementary material for: Small RNA Bidirectional Crosstalk During the Interaction Between Wheat and Zymoseptoria tritici
Source: Front Plant Sci. 2020 Jan 8;10:1669. doi: 10.3389/fpls.2019.01669 (PMC6960233; doi:10.3389/fpls.2019.01669)
Supplement: Supplementary file 3 [file Table_3.xlsx]

## Sheet: fungi_srna_up_wheat_gene_down_i
Induced or highly expressed fungal sRNAs target and downregulate wheat genes
fungal_srna	wheat_gene	expectatioin	MFE_ratio	annotation	pfam	interpro	fungal_srna_7dpi	fungal_srna_12dpi	fungal_srna_14dpi	fungal_srna_vitro	wheat_gene_7dpi	wheat_gene_12dpi	wheat_gene_14dpi	wheat_mock_7dpi	wheat_mock_12dpi
sRNA25	TraesCS1D01G409700.1	1	1	Ribosome maturation factor rimM	PF01782: RimM N-terminal domain; PF05239: PRC-barrel domain; PF01704: UTP--glucose-1-phosphate uridylyltransferase	IPR002618: UDPGP family; IPR002676: RimM protein; IPR009000: Translation protein, beta-barrel domain; IPR011033: PRC-barrel-like; IPR011961: 16S rRNA processing protein RimM; IPR027275: PRC-barrel domain; IPR029044: Nucleotide-diphospho-sugar transferases	4.7	8.81	2.318	0	1.837	1.213	0	1.877	4.28
sRNA12	TraesCS3D01G201500.1	2.5	NA	Callose synthase-like protein	PF04652: Vta1 like; PF14288: 1,3-beta-glucan synthase subunit FKS1, domain-1; PF02364: 1,3-beta-glucan synthase component	IPR003440: Glycosyl transferase, family 48; IPR023175: Vacuolar protein sorting-associate protein Vta1/Callose synthase, N-terminal domain; IPR026899: 1,3-beta-glucan synthase subunit FKS1-like, domain-1	25.883	21.521	25.381	0.252	0.883	0.438	0.467	1.662	1.289
sRNA25	TraesCS3A01G438500.1	2.5	0.760807	Disease resistance protein RPM1	PF00931: NB-ARC domain	IPR002182: NB-ARC; IPR011991: Winged helix-turn-helix DNA-binding domain; IPR032675: Leucine-rich repeat domain, L domain-like	4.7	8.81	2.318	0	1.503	0.712	0.145	2.144	2.136
sRNA25	TraesCS3B01G102900.1	2.5	0.919308	AT2G31890-like protein	PF08373: RAP domain	IPR013584: RAP domain	4.7	8.81	2.318	0	1.653	1.14	0.181	2.489	3.706
sRNA25	TraesCS3A01G087500.1	2.5	0.919308	AT2G31890-like protein	PF08373: RAP domain	IPR011989: Armadillo-like helical; IPR013584: RAP domain	4.7	8.81	2.318	0	4.824	3.759	0.857	8.35	9.944
sRNA25	TraesCS3D01G544700.1	2.5	0.818444	Kinase interacting (KIP1-like) family protein	PF07765: KIP1-like protein	IPR011684: Protein Networked (NET), actin-binding (NAB) domain	4.7	8.81	2.318	0	2.169	0.419	0	2.669	1.395
sRNA347	TraesCS6D01G262800.1	2.5	0.803977	Threonine--tRNA ligase	PF07973: Threonyl and Alanyl tRNA synthetase second additional domain; PF00587: tRNA synthetase class II core domain (G, H, P, S and T); PF03129: Anticodon binding domain	IPR002314: Aminoacyl-tRNA synthetase, class II (G/ P/ S/T); IPR002320: Threonine-tRNA ligase, class IIa; IPR004154: Anticodon-binding; IPR006195: Aminoacyl-tRNA synthetase, class II; IPR012947: Threonyl/alanyl tRNA synthetase, SAD; IPR018163: Threonyl/alanyl tRNA synthetase, class II-like, putative editing domain	1629.08	5270.08	11642.2	50.687	18.74	14.545	7.536	34.959	31.907
sRNA426	TraesCS2B01G131400.1	2.5	0.90205	Universal stress protein	PF00582: Universal stress protein family	IPR006015: Universal stress protein A; IPR006016: UspA; IPR014729: Rossmann-like alpha/beta/alpha sandwich fold	223.696	144.415	18.063	329.941	16.601	6.908	1.379	16.136	14.871
sRNA78	TraesCS3B01G422800.1	2.5	NA	Ceramide glucosyltransferase, putative	PF13506: Glycosyl transferase family 21	IPR025993: Ceramide glucosyltransferase; IPR029044: Nucleotide-diphospho-sugar transferases	114.042	38.555	16.869	103.597	1.647	3.035	31.371	3.552	1.946
sRNA82	TraesCS1A01G292100.1	2.5	0.720081	Kinase family protein	PF00069: Protein kinase domain	IPR000719: Protein kinase domain; IPR008271: Serine/threonine-protein kinase, active site; IPR011009: Protein kinase-like domain	5.309	21.645	112.987	0.524	8.252	4.676	1.85	12.211	12.059
sRNA19	TraesCS1A01G400500.1	3	0.719512	Dehydrin 3 protein	PF04481: Protein of unknown function (DUF561)	IPR007570: Uncharacterised protein family Ycf23; IPR013785: Aldolase-type TIM barrel	29.725	29.247	42.891	0.746	1.93	1.067	6.219	5.485	7.137
sRNA19	TraesCS1D01G408300.1	3	0.719512	Dehydrin 3 protein	PF04481: Protein of unknown function (DUF561)	IPR007570: Uncharacterised protein family Ycf23; IPR013785: Aldolase-type TIM barrel	29.725	29.247	42.891	0.746	0.352	0.258	2.183	1.426	0.958
sRNA24	TraesCS3D01G217600.1	3	0.830189	Protein kinase family protein	PF00069: Protein kinase domain	IPR000719: Protein kinase domain; IPR008271: Serine/threonine-protein kinase, active site; IPR011009: Protein kinase-like domain; IPR017441: Protein kinase, ATP binding site	260.577	769.866	1427.09	3.116	2.917	1.283	0.909	5.132	3.736
sRNA347	TraesCS3D01G506700.1	3	NA	Protein DETOXIFICATION	PF01554: MatE	IPR002528: Multi antimicrobial extrusion protein	1629.08	5270.08	11642.2	50.687	0.064	0.188	0.11	0.479	0.183
sRNA347	TraesCS3B01G563500.1	3	NA	Protein DETOXIFICATION	PF01554: MatE	IPR002528: Multi antimicrobial extrusion protein	1629.08	5270.08	11642.2	50.687	1.379	0.824	0.171	5.895	0.553
sRNA426	TraesCS2A01G517500.3	3	0.731207	Chloride channel protein	PF00654: Voltage gated chloride channel; PF00571: CBS domain	IPR000644: CBS domain; IPR001807: Chloride channel, voltage gated; IPR002251: Chloride channel ClC-plant; IPR014743: Chloride channel, core	223.696	144.415	18.063	329.941	19.843	14.659	8.118	31.747	40.81
sRNA426	TraesCS2D01G519000.2	3	0.731207	Chloride channel protein	PF00654: Voltage gated chloride channel; PF00571: CBS domain	IPR000644: CBS domain; IPR001807: Chloride channel, voltage gated; IPR002251: Chloride channel ClC-plant; IPR014743: Chloride channel, core	223.696	144.415	18.063	329.941	4.827	3.683	1.951	6.187	9.01
sRNA426	TraesCS2B01G546000.1	3	0.731207	Chloride channel protein	PF00654: Voltage gated chloride channel; PF00571: CBS domain	IPR000644: CBS domain; IPR001807: Chloride channel, voltage gated; IPR002251: Chloride channel ClC-plant; IPR014743: Chloride channel, core	223.696	144.415	18.063	329.941	4.278	3.23	1.68	6.727	9.645
sRNA438	TraesCS4B01G110200.1	3	0.819572	Filament-like plant protein	PF05911: Filament-like plant protein, long coiled-coil	IPR008587: Filament-like plant protein	166.176	274.91	342.951	1993.45	0.258	0.193	0.096	0.229	0.654
sRNA439	TraesCS4B01G110200.1	3	0.819242	Filament-like plant protein	PF05911: Filament-like plant protein, long coiled-coil	IPR008587: Filament-like plant protein	121.943	174.03	683.483	6687.07	0.258	0.193	0.096	0.229	0.654
sRNA56	TraesCS3D01G528300.1	3	0.71875	Disease resistance protein RPM1	PF00931: NB-ARC domain	IPR002182: NB-ARC; IPR027417: P-loop containing nucleoside triphosphate hydrolase	12.775	3.629	14.045	0	0.42	0.419	0.245	1.468	0.943
sRNA64	TraesCS3D01G201500.1	3	NA	Callose synthase-like protein	PF04652: Vta1 like; PF14288: 1,3-beta-glucan synthase subunit FKS1, domain-1; PF02364: 1,3-beta-glucan synthase component	IPR003440: Glycosyl transferase, family 48; IPR023175: Vacuolar protein sorting-associate protein Vta1/Callose synthase, N-terminal domain; IPR026899: 1,3-beta-glucan synthase subunit FKS1-like, domain-1	24.447	24.607	58.553	4.535	0.883	0.438	0.467	1.662	1.289
sRNA138	TraesCS2D01G136200.1	3.5	0.743523	Magnesium-chelatase subunit H	PF11965: Domain of unknown function (DUF3479); PF02514: CobN/Magnesium Chelatase	IPR003672: CobN/magnesium chelatase; IPR011771: Magnesium-chelatase, subunit H; IPR022571: Magnesium chelatase, subunit H, N-terminal	309.766	241.922	203.257	4103.4	34.331	15.306	1.361	127.866	66.882
sRNA138	TraesCS2A01G134000.1	3.5	0.743523	Magnesium-chelatase subunit H	PF11965: Domain of unknown function (DUF3479); PF02514: CobN/Magnesium Chelatase	IPR003672: CobN/magnesium chelatase; IPR011771: Magnesium-chelatase, subunit H; IPR022571: Magnesium chelatase, subunit H, N-terminal	309.766	241.922	203.257	4103.4	47.549	20.26	1.638	192.577	105.422
sRNA16	TraesCS4D01G342300.1	3.5	0.72439	Endoribonuclease Dicer-like protein 3	PF04851: Type III restriction enzyme, res subunit; PF00271: Helicase conserved C-terminal domain; PF03368: Dicer dimerisation domain; PF02170: PAZ domain; PF00636: Ribonuclease III domain; PF14709: double strand RNA binding domain from DEAD END PROTEIN 1	IPR000999: Ribonuclease III domain; IPR001650: Helicase, C-terminal; IPR003100: PAZ domain; IPR005034: Dicer dimerisation domain; IPR006935: Helicase/UvrB, N-terminal; IPR011907: Ribonuclease III; IPR014001: Helicase superfamily 1/2, ATP-binding domain; IPR014720: Double-stranded RNA-binding domain; IPR027417: P-loop containing nucleoside triphosphate hydrolase	5.835	4.54	17.695	0.134	4.539	2.717	2.178	8.028	5.495
sRNA24	TraesCS1A01G100400.1	3.5	0.730458	Serine/threonine-protein kinase	PF01453: D-mannose binding lectin; PF00954: S-locus glycoprotein domain; PF08276: PAN-like domain; PF07714: Protein tyrosine kinase	IPR000719: Protein kinase domain; IPR000858: S-locus glycoprotein domain; IPR001245: Serine-threonine/tyrosine-protein kinase, catalytic domain; IPR001480: Bulb-type lectin domain; IPR003609: PAN/Apple domain; IPR008271: Serine/threonine-protein kinase, active site; IPR011009: Protein kinase-like domain; IPR017441: Protein kinase, ATP binding site; IPR024171: S-receptor-like serine/threonine-prot…	260.577	769.866	1427.09	3.116	4.249	3.269	1.301	6.573	8.158
sRNA24	TraesCS3D01G225200.1	3.5	NA	Receptor-like protein kinase	PF00069: Protein kinase domain	IPR000719: Protein kinase domain; IPR008271: Serine/threonine-protein kinase, active site; IPR011009: Protein kinase-like domain; IPR017441: Protein kinase, ATP binding site	260.577	769.866	1427.09	3.116	1.854	0.343	0.043	6.819	1.497
sRNA26	TraesCS7D01G447300.2	3.5	NA	BEACH domain-containing protein lvsC	PF13385: Concanavalin A-like lectin/glucanases superfamily; PF15787: Domain of unknown function (DUF4704); PF16057: Domain of unknown function (DUF4800); PF14844: PH domain associated with Beige/BEACH; PF02138: Beige/BEACH domain; PF00400: WD domain, G-beta repeat	IPR000409: BEACH domain; IPR001680: WD40 repeat; IPR011989: Armadillo-like helical; IPR011993: PH domain-like; IPR013320: Concanavalin A-like lectin/glucanase domain; IPR015943: WD40/YVTN repeat-like-containing domain; IPR016024: Armadillo-type fold; IPR017986: WD40-repeat-containing domain; IPR023362: PH-BEACH domain; IPR031570: Domain of unknown function DUF4704	58.021	84.163	140.46	0.519	0.055	0.01	0.013	0.217	0.104
sRNA35	TraesCS2A01G292800.1	3.5	0.705128	Protein kinase	PF00069: Protein kinase domain	IPR000719: Protein kinase domain; IPR008271: Serine/threonine-protein kinase, active site; IPR011009: Protein kinase-like domain	72.957	796.049	3129.17	7.532	15.103	3.714	0.245	26.151	10.418
sRNA371	TraesCS4D01G150700.1	3.5	0.723514	Chloroplastic group IIA intron splicing facilitator CRS1, chloroplastic	PF01985: CRS1 / YhbY (CRM) domain	IPR001890: RNA-binding, CRM domain	0	3.732	0.949	0.084	5.047	3.621	0.471	8.889	9.493
sRNA371	TraesCS5D01G018100.1	3.5	NA	ERD (Early-responsive to dehydration stress) family protein	PF13967: Late exocytosis, associated with Golgi transport; PF14703: Cytosolic domain of 10TM putative phosphate transporter; PF02714: Calcium-dependent channel, 7TM region, putative phosphate	IPR003864: Calcium-dependent channel, 7TM region, putative phosphate; IPR027815: 10TM putative phosphate transporter, cytosolic domain; IPR032880: Calcium permeable stress-gated cation channel 1, N-terminal transmembrane domain	0	3.732	0.949	0.084	5.908	3.256	2.781	9.554	6.608
sRNA394	TraesCS5B01G006500.1	3.5	NA	Lipoxygenase	PF01477: PLAT/LH2 domain; PF00305: Lipoxygenase	IPR001024: PLAT/LH2 domain; IPR001246: Lipoxygenase, plant; IPR013819: Lipoxygenase, C-terminal; IPR020833: Lipoxygenase, iron binding site; IPR020834: Lipoxygenase, conserved site; IPR027433: Lipoxygenase, domain 3	0	13.068	11.132	0.841	1.947	0.196	0	26.108	1.402
sRNA394	TraesCS5D01G013400.1	3.5	NA	Lipoxygenase	PF01477: PLAT/LH2 domain; PF00305: Lipoxygenase	IPR001024: PLAT/LH2 domain; IPR001246: Lipoxygenase, plant; IPR013819: Lipoxygenase, C-terminal; IPR020833: Lipoxygenase, iron binding site; IPR020834: Lipoxygenase, conserved site; IPR027433: Lipoxygenase, domain 3	0	13.068	11.132	0.841	3.974	0.279	0.133	34.965	4.437
sRNA533	TraesCS3D01G544800.2	3.5	NA	Protein N-methyltransferase	PF00856: SET domain; PF09273: Rubisco LSMT substrate-binding	IPR001214: SET domain; IPR015353: Rubisco LSMT, substrate-binding domain	0	5.186	1.35	1.019	2.886	0.354	0.024	3.32	2.046
sRNA56	TraesCS5D01G167500.1	3.5	0.815625	Kinesin-like protein	PF00225: Kinesin motor domain	IPR001752: Kinesin motor domain; IPR019821: Kinesin motor domain, conserved site; IPR027417: P-loop containing nucleoside triphosphate hydrolase	12.775	3.629	14.045	0	2.319	0.973	0.083	4.421	3.16
sRNA56	TraesCS6B01G077900.1	3.5	0.85625	WD40 domain-containing protein			12.775	3.629	14.045	0	2.352	1.005	0	5.473	4.604
sRNA56	TraesCS3D01G117800.1	3.5	0.825	Choline/ethanolamine kinase	PF01633: Choline/ethanolamine kinase	IPR011009: Protein kinase-like domain	12.775	3.629	14.045	0	2.183	2.451	1.98	5.437	6.239
sRNA56	TraesCS3B01G136500.1	3.5	0.765625	Remodeling and spacing factor 1			12.775	3.629	14.045	0	1.243	0.957	0.56	2.626	1.525
sRNA56	TraesCS3D01G119300.1	3.5	0.765625	Remodeling and spacing factor 1			12.775	3.629	14.045	0	1.341	0.919	0.509	2.949	1.656
sRNA56	TraesCS2D01G096500.1	3.5	NA	Ubiquitin thioesterase	PF10275: Peptidase C65 Otubain	IPR003323: OTU domain; IPR019400: Peptidase C65, otubain	12.775	3.629	14.045	0	1.577	0.817	0.358	3.465	3.176
sRNA629	TraesCS5A01G230600.1	3.5	NA	TIR-NBS-LRR class disease resistance protein	PF12799: Leucine Rich repeats (2 copies)	IPR001611: Leucine-rich repeat; IPR025875: Leucine rich repeat 4; IPR032675: Leucine-rich repeat domain, L domain-like	0	2.629	1.946	0.084	0.561	0.271	0.055	0.999	1.138
sRNA78	TraesCS2A01G426200.3	3.5	0.742647	Protein kinase family protein	PF14381: Ethylene-responsive protein kinase Le-CTR1; PF07714: Protein tyrosine kinase	IPR000719: Protein kinase domain; IPR001245: Serine-threonine/tyrosine-protein kinase, catalytic domain; IPR008271: Serine/threonine-protein kinase, active site; IPR011009: Protein kinase-like domain; IPR017441: Protein kinase, ATP binding site	114.042	38.555	16.869	103.597	3.749	3.382	7.581	4.56	9.843
sRNA78	TraesCS2D01G424300.1	3.5	0.742647	Protein kinase family protein	PF14381: Ethylene-responsive protein kinase Le-CTR1; PF07714: Protein tyrosine kinase	IPR000719: Protein kinase domain; IPR001245: Serine-threonine/tyrosine-protein kinase, catalytic domain; IPR008271: Serine/threonine-protein kinase, active site; IPR011009: Protein kinase-like domain; IPR017441: Protein kinase, ATP binding site	114.042	38.555	16.869	103.597	4.338	3.545	9.633	5.878	11.012
sRNA96	TraesCS5D01G209200.1	3.5	NA	Type I inositol-1,4,5-trisphosphate 5-phosphatase	PF03372: Endonuclease/Exonuclease/phosphatase family	IPR000300: Inositol polyphosphate-related phosphatase; IPR005135: Endonuclease/exonuclease/phosphatase	1.023	3.486	2.829	0.222	0.927	0.631	0.693	3.089	2.843
sRNA96	TraesCS1A01G135600.1	3.5	NA	Ion channel pollux-like protein	PF06241: Castor and Pollux, part of voltage-gated ion channel	IPR010420: CASTOR/POLLUX/SYM8 ion channels	1.023	3.486	2.829	0.222	7.683	6.237	7.152	14.263	13.533
sRNA1	TraesCS3D01G258900.1	4	NA	Methyltransferase	PF08241: Methyltransferase domain; PF13489: Methyltransferase domain	IPR013216: Methyltransferase type 11; IPR025771: Phosphoethanolamine N-methyltransferase; IPR029063: S-adenosyl-L-methionine-dependent methyltransferase	1309.69	1110.1	2484.48	7323.72	16.824	4.178	0.74	34.335	13.273
sRNA1	TraesCS3A01G258400.3	4	NA	ABC transporter B family protein	PF00664: ABC transporter transmembrane region; PF00005: ABC transporter	IPR003439: ABC transporter-like; IPR003593: AAA+ ATPase domain; IPR011527: ABC transporter type 1, transmembrane domain; IPR017871: ABC transporter, conserved site; IPR027417: P-loop containing nucleoside triphosphate hydrolase	1309.69	1110.1	2484.48	7323.72	0.57	0.402	0.527	0.539	1.425
sRNA117	TraesCS6B01G405300.1	4	NA	Chaperonin 60 subunit beta 1, chloroplastic			1.023	3.961	0.467	0.39	0.82	0.337	0.08	1.568	1.305
sRNA13	TraesCS6A01G116600.1	4	NA	Polynucleotide 5'-hydroxyl-kinase NOL9	PF16575: mRNA cleavage and polyadenylation factor CLP1 P-loop	IPR027417: P-loop containing nucleoside triphosphate hydrolase; IPR032319: Polyribonucleotide 5'-hydroxyl-kinase Clp1, P-loop domain	13.633	4.293	7.788	0.272	0.697	0.541	0.223	3.073	0.777
sRNA130	TraesCS3D01G353300.1	4	NA	O-fucosyltransferase family protein	PF10250: GDP-fucose protein O-fucosyltransferase	IPR019378: GDP-fucose protein O-fucosyltransferase; IPR024709: O-fucosyltransferase, plant	9.512	19.304	6.081	4.049	5.355	3.239	2.889	8.505	7.134
sRNA130	TraesCS1D01G343800.1	4	NA	Kinesin-like protein	PF00307: Calponin homology (CH) domain; PF00225: Kinesin motor domain	IPR001715: Calponin homology domain; IPR001752: Kinesin motor domain; IPR027417: P-loop containing nucleoside triphosphate hydrolase	9.512	19.304	6.081	4.049	1.806	0.814	2.61	3.014	2.468
sRNA130	TraesCS1B01G354200.2	4	NA	Kinesin-like protein	PF00307: Calponin homology (CH) domain; PF00225: Kinesin motor domain	IPR001715: Calponin homology domain; IPR001752: Kinesin motor domain; IPR027417: P-loop containing nucleoside triphosphate hydrolase	9.512	19.304	6.081	4.049	2.119	1.087	4.619	3.616	2.692
sRNA138	TraesCS5B01G566100.1	4	NA	Ubiquitin-conjugating enzyme E2	PF00179: Ubiquitin-conjugating enzyme	IPR000608: Ubiquitin-conjugating enzyme E2; IPR016135: Ubiquitin-conjugating enzyme/RWD-like; IPR023313: Ubiquitin-conjugating enzyme, active site	309.766	241.922	203.257	4103.4	126.09	104.885	211.514	163.807	253.26
sRNA138	TraesCS3B01G089800.1	4	NA	Membrane protein insertase YidC	PF02096: 60Kd inner membrane protein	IPR001708: Membrane insertase OXA1/ALB3/YidC; IPR028055: Membrane insertase YidC/Oxa1, C-terminal	309.766	241.922	203.257	4103.4	104.027	61.042	22.744	187.816	153.438
sRNA16	TraesCS6A01G216300.2	4	NA	Eukaryotic translation initiation factor	PF08662: Eukaryotic translation initiation factor eIF2A	IPR011387: Translation initiation factor 2A; IPR013979: Translation initiation factor, beta propellor-like domain; IPR015943: WD40/YVTN repeat-like-containing domain	5.835	4.54	17.695	0.134	13.08	8.797	3.217	19.949	18.823
sRNA19	TraesCS6B01G445000.3	4	0.704878				29.725	29.247	42.891	0.746	7.662	7.368	22.8	11.004	15.145
sRNA205	TraesCS2B01G198900.1	4	0.763587	DUF2996 family protein	PF11210: Protein of unknown function (DUF2996)	IPR021374: Protein of unknown function DUF2996	1.632	5.922	3.888	1.157	40.822	14.713	1.797	98.693	41.627
sRNA26	TraesCS1A01G379900.1	4	NA	Thioredoxin superfamily protein		IPR012336: Thioredoxin-like fold	58.021	84.163	140.46	0.519	16.228	13.062	13.786	22.196	29.128
sRNA26	TraesCS1B01G415800.1	4	NA	Ubiquitin-conjugating enzyme E2	PF00179: Ubiquitin-conjugating enzyme	IPR000608: Ubiquitin-conjugating enzyme E2; IPR016135: Ubiquitin-conjugating enzyme/RWD-like	58.021	84.163	140.46	0.519	2.412	1.675	1.137	2.731	4.424
sRNA343	TraesCS3A01G360000.3	4	NA				1.632	19.712	17.453	4.208	6.64	3.668	1.045	7.68	16.675
sRNA347	TraesCS2B01G080100.1	4	0.758523	Receptor-kinase, putative	PF08263: Leucine rich repeat N-terminal domain; PF13855: Leucine rich repeat; PF00069: Protein kinase domain	IPR000719: Protein kinase domain; IPR001611: Leucine-rich repeat; IPR003591: Leucine-rich repeat, typical subtype; IPR008271: Serine/threonine-protein kinase, active site; IPR011009: Protein kinase-like domain; IPR013210: Leucine-rich repeat-containing N-terminal, plant-type; IPR032675: Leucine-rich repeat domain, L domain-like	1629.08	5270.08	11642.2	50.687	1.912	0.733	0.438	2.038	2.248
sRNA35	TraesCS3B01G381100.1	4	NA	Thioredoxin family protein		IPR012336: Thioredoxin-like fold	72.957	796.049	3129.17	7.532	7.027	4.942	0.939	8.151	10.558
sRNA371	TraesCS7A01G418600.1	4	NA	HKT23 transporter	PF02386: Cation transport protein	IPR003445: Cation transporter	0	3.732	0.949	0.084	8.486	6.463	6.057	6.927	15.985
sRNA371	TraesCS3A01G458100.1	4	NA	Spermatogenesis-associated protein 20	PF03190: Protein of unknown function, DUF255	IPR004879: Domain of unknown function DUF255; IPR008928: Six-hairpin glycosidase-like; IPR012336: Thioredoxin-like fold; IPR024705: Spermatogenesis-associated protein 20	0	3.732	0.949	0.084	2.802	1.89	0.947	4.634	5.252
sRNA371	TraesCS6A01G097900.1	4	NA	Transmembrane protein 53	PF05705: Eukaryotic protein of unknown function (DUF829)	IPR008547: Protein of unknown function DUF829, TMEM53; IPR029058: Alpha/Beta hydrolase fold	0	3.732	0.949	0.084	3.697	2.014	3.174	7.697	5.399
sRNA394	TraesCS4B01G013800.1	4	0.70557	Cationic amino acid transporter, putative	PF13520: Amino acid permease; PF13906: C-terminus of AA_permease	IPR002293: Amino acid/polyamine transporter I; IPR029485: Cationic amino acid transporter, C-terminal	0	13.068	11.132	0.841	0.171	0.226	0.712	0.219	1.025
sRNA438	TraesCS3B01G181300.1	4	NA	5'-methylthioadenosine/S-adenosylhomocysteine nucleosidase	PF01048: Phosphorylase superfamily	IPR000845: Nucleoside phosphorylase domain	166.176	274.91	342.951	1993.45	57.756	5.219	1.539	121.748	34.488
sRNA439	TraesCS3B01G181300.1	4	NA	5'-methylthioadenosine/S-adenosylhomocysteine nucleosidase	PF01048: Phosphorylase superfamily	IPR000845: Nucleoside phosphorylase domain	121.943	174.03	683.483	6687.07	57.756	5.219	1.539	121.748	34.488
sRNA508	TraesCS6A01G270900.1	4	NA	Rop guanine nucleotide exchange factor, putative	PF03759: PRONE (Plant-specific Rop nucleotide exchanger)	IPR005512: PRONE domain	1.632	3.329	1.126	0	0.68	0.243	0.385	1.478	1.084
sRNA526	TraesCS1A01G005200.1	4	NA	Receptor protein kinase, putative	PF08263: Leucine rich repeat N-terminal domain; PF13855: Leucine rich repeat; PF00069: Protein kinase domain	IPR000719: Protein kinase domain; IPR001611: Leucine-rich repeat; IPR003591: Leucine-rich repeat, typical subtype; IPR008266: Tyrosine-protein kinase, active site; IPR011009: Protein kinase-like domain; IPR013210: Leucine-rich repeat-containing N-terminal, plant-type; IPR032675: Leucine-rich repeat domain, L domain-like	263.354	237.16	110.85	832.226	3.205	2.568	1.612	4.601	5.613
sRNA526	TraesCS1A01G224700.1	4	0.741076	Chlorophyll synthase	PF01040: UbiA prenyltransferase family	IPR000537: UbiA prenyltransferase family; IPR006372: Bacteriochlorophyll/chlorophyll synthetase; IPR011799: Chlorophyll synthase, ChlG	263.354	237.16	110.85	832.226	42.981	21.772	4.001	75.241	61.326
sRNA526	TraesCS1D01G226100.1	4	0.741076	Chlorophyll synthase	PF01040: UbiA prenyltransferase family	IPR000537: UbiA prenyltransferase family; IPR006372: Bacteriochlorophyll/chlorophyll synthetase; IPR011799: Chlorophyll synthase, ChlG	263.354	237.16	110.85	832.226	24.643	14.185	1.677	47.303	41.941
sRNA526	TraesCS1A01G384800.1	4	NA	light-independent protochlorophyllide reductase subunit			263.354	237.16	110.85	832.226	919.935	2681.7	2385.81	8314.08	2948.07
sRNA526	TraesCS3B01G130100.1	4	NA	Wd40-repeat-like protein	PF00400: WD domain, G-beta repeat	IPR001680: WD40 repeat; IPR001810: F-box domain; IPR015943: WD40/YVTN repeat-like-containing domain; IPR017986: WD40-repeat-containing domain; IPR019775: WD40 repeat, conserved site	263.354	237.16	110.85	832.226	5.884	4.174	3.442	13.959	11.117
sRNA53	TraesCS2B01G291800.1	4	0.751899	Protein phosphatase 2C containing protein	PF00481: Protein phosphatase 2C	IPR001932: PPM-type phosphatase domain	14.768	12.902	22.911	0	23.639	20.086	32.27	41.183	47.412
sRNA53	TraesCS2D01G273100.1	4	0.751899	Protein phosphatase 2C containing protein	PF00481: Protein phosphatase 2C	IPR001932: PPM-type phosphatase domain	14.768	12.902	22.911	0	6.909	6.365	16.762	11.944	16.164
sRNA533	TraesCS3B01G432400.1	4	NA	ABC transporter ATP-binding protein	PF00005: ABC transporter	IPR003439: ABC transporter-like; IPR003593: AAA+ ATPase domain; IPR027417: P-loop containing nucleoside triphosphate hydrolase	0	5.186	1.35	1.019	14.077	13.297	27.431	25.626	31.139
sRNA56	TraesCS3D01G188200.1	4	NA	Aconitate hydratase	PF00330: Aconitase family (aconitate hydratase); PF00694: Aconitase C-terminal domain	IPR000573: Aconitase A/isopropylmalate dehydratase small subunit, swivel domain; IPR001030: Aconitase/3-isopropylmalate dehydratase large subunit, alpha/beta/alpha domain; IPR006249: Aconitase/Iron-responsive element-binding protein 2; IPR015928: Aconitase/3-isopropylmalate dehydratase, swivel; IPR015931: Aconitase/3-isopropylmalate dehydratase large subunit, alpha/beta/alpha, subdomain 1/3; IPR0…	12.775	3.629	14.045	0	26.588	13.891	13.108	38.301	29.564
sRNA629	TraesCS3D01G392600.1	4	0.864103	Calcium sensing receptor, chloroplastic	PF00581: Rhodanese-like domain	IPR001763: Rhodanese-like domain	0	2.629	1.946	0.084	94.212	50.825	7.934	199.621	168.612
sRNA629	TraesCS3B01G430900.1	4	0.864103	Calcium sensing receptor, chloroplastic	PF00581: Rhodanese-like domain	IPR001763: Rhodanese-like domain	0	2.629	1.946	0.084	70.201	39.887	5.956	142.131	105.346
sRNA629	TraesCS3A01G398500.1	4	0.864103	Calcium sensing receptor, chloroplastic	PF00581: Rhodanese-like domain	IPR001763: Rhodanese-like domain	0	2.629	1.946	0.084	110.864	66.962	10.915	198.54	157.337
sRNA629	TraesCS1A01G409700.1	4	0.858974	tRNA dimethylallyltransferase	PF11341: Protein of unknown function (DUF3143)	IPR021489: Protein of unknown function DUF3143	0	2.629	1.946	0.084	10.835	6.087	3.354	21.075	20.351
sRNA629	TraesCS6A01G219200.1	4	0.735897	PsaB RNA binding protein	PF06485: Protein of unknown function (DUF1092)	IPR009472: Tab2-like	0	2.629	1.946	0.084	28.87	11.481	1.201	46.439	29.956
sRNA629	TraesCS3D01G156500.1	4	NA	Cold induced protein			0	2.629	1.946	0.084	86.202	65.828	19.913	94.596	145.167
sRNA629	TraesCS1A01G375600.2	4	0.717949	Heat shock transcription factor	PF00447: HSF-type DNA-binding	IPR000232: Heat shock factor (HSF)-type, DNA-binding; IPR011991: Winged helix-turn-helix DNA-binding domain	0	2.629	1.946	0.084	9.606	1.54	0.542	10.375	6.376
sRNA629	TraesCS1D01G382900.1	4	0.717949	Heat shock transcription factor	PF00447: HSF-type DNA-binding	IPR000232: Heat shock factor (HSF)-type, DNA-binding; IPR011991: Winged helix-turn-helix DNA-binding domain	0	2.629	1.946	0.084	5.736	0.812	0.544	5.936	4.816
sRNA8	TraesCS5A01G357600.1	4	NA	Histone-lysine N-methyltransferase	PF16135: TPL-binding domain in jasmonate signalling; PF13831: PHD-finger; PF13832: PHD-zinc-finger like domain; PF00856: SET domain	IPR001214: SET domain; IPR001965: Zinc finger, PHD-type; IPR003616: Post-SET domain; IPR011011: Zinc finger, FYVE/PHD-type; IPR013083: Zinc finger, RING/FYVE/PHD-type; IPR019787: Zinc finger, PHD-finger; IPR032308: Jas TPL-binding domain; IPR034732: Extended PHD (ePHD) domain	24.612	51.508	127.187	0.662	0.139	0.091	0	0.347	0.155
sRNA82	TraesCS2B01G138200.1	4	NA	Ubiquitin carboxyl-terminal hydrolase 2	PF13968: Domain of unknown function (DUF4220); PF04578: Protein of unknown function, DUF594	IPR007658: Protein of unknown function DUF594; IPR025315: Domain of unknown function DUF4220	5.309	21.645	112.987	0.524	2.267	0.788	0.265	2.971	3.206
sRNA96	TraesCS2B01G112000.1	4	NA	Poly(A) polymerase	PF04928: Poly(A) polymerase central domain; PF01909: Nucleotidyltransferase domain	IPR002934: Polymerase, nucleotidyl transferase domain; IPR007012: Poly(A) polymerase, central domain; IPR011068: Nucleotidyltransferase, class I, C-terminal-like	1.023	3.486	2.829	0.222	12.635	4.199	3.902	11.363	9.314
sRNA1	TraesCS1B01G005100.3	4.5	NA	E3 ubiquitin-protein ligase SINA-like 10			1309.69	1110.1	2484.48	7323.72	4.988	3.511	1.618	7.337	9.391
sRNA138	TraesCS4A01G313600.1	4.5	NA	Ubiquitin-conjugating enzyme E2	PF00179: Ubiquitin-conjugating enzyme	IPR000608: Ubiquitin-conjugating enzyme E2; IPR016135: Ubiquitin-conjugating enzyme/RWD-like; IPR023313: Ubiquitin-conjugating enzyme, active site	309.766	241.922	203.257	4103.4	46.179	36.118	93.049	67.951	73.211
sRNA138	TraesCS5D01G558500.1	4.5	NA	Ubiquitin-conjugating enzyme E2	PF00179: Ubiquitin-conjugating enzyme	IPR000608: Ubiquitin-conjugating enzyme E2; IPR016135: Ubiquitin-conjugating enzyme/RWD-like; IPR023313: Ubiquitin-conjugating enzyme, active site	309.766	241.922	203.257	4103.4	37.192	41.359	89.47	34.304	85.628
sRNA19	TraesCS6A01G285600.2	4.5	0.726829	UDP-Glycosyltransferase superfamily protein	PF07762: Protein of unknown function (DUF1618)	IPR011676: Domain of unknown function DUF1618	29.725	29.247	42.891	0.746	6.533	3.659	5.162	12.256	10.014
sRNA19	TraesCS4B01G188600.1	4.5	NA	Arginine/serine-rich coiled-coil 2			29.725	29.247	42.891	0.746	1.506	1.078	1.615	1.898	3.253
sRNA19	TraesCS2B01G138200.1	4.5	NA	Ubiquitin carboxyl-terminal hydrolase 2	PF13968: Domain of unknown function (DUF4220); PF04578: Protein of unknown function, DUF594	IPR007658: Protein of unknown function DUF594; IPR025315: Domain of unknown function DUF4220	29.725	29.247	42.891	0.746	2.267	0.788	0.265	2.971	3.206
sRNA205	TraesCS2D01G590200.1	4.5	NA	Peroxisomal membrane (Mpv17/PMP22) family protein	PF04117: Mpv17 / PMP22 family	IPR007248: Mpv17/PMP22	1.632	5.922	3.888	1.157	1256.4	495.128	176.832	2738	1297.61
sRNA205	TraesCS2B01G608900.1	4.5	NA	Peroxisomal membrane (Mpv17/PMP22) family protein	PF04117: Mpv17 / PMP22 family	IPR007248: Mpv17/PMP22	1.632	5.922	3.888	1.157	155.239	26.254	3.537	507.233	121.561
sRNA205	TraesCS2D01G255600.1	4.5	NA	Mitochondrial transcription termination factor family	PF02536: mTERF	IPR003690: Transcription termination factor, mitochondrial/chloroplastic	1.632	5.922	3.888	1.157	5.11	3.043	1.417	8.457	8.674
sRNA205	TraesCS2B01G267000.1	4.5	NA	Mitochondrial transcription termination factor family	PF02536: mTERF	IPR003690: Transcription termination factor, mitochondrial/chloroplastic	1.632	5.922	3.888	1.157	4.864	3.017	1.577	8.797	6.592
sRNA24	TraesCS7A01G140300.2	4.5	NA	2-oxoglutarate (2OG) and Fe(II)-dependent oxygenase superfamily protein	PF14226: non-haem dioxygenase in morphine synthesis N-terminal; PF03171: 2OG-Fe(II) oxygenase superfamily	IPR005123: Oxoglutarate/iron-dependent dioxygenase; IPR026992: Non-haem dioxygenase N-terminal domain; IPR027443: Isopenicillin N synthase-like	260.577	769.866	1427.09	3.116	0.543	0.147	0	2.547	0.852
sRNA24	TraesCS6D01G098200.1	4.5	0.754717	Myb family transcription factor-like	PF00249: Myb-like DNA-binding domain	IPR001005: SANT/Myb domain; IPR006447: Myb domain, plants; IPR009057: Homeobox domain-like; IPR017930: Myb domain	260.577	769.866	1427.09	3.116	1.34	0.888	1.167	2.189	3.097
sRNA26	TraesCS5A01G175200.1	4.5	NA	Protein FLUORESCENT IN BLUE LIGHT, chloroplastic	PF13424: Tetratricopeptide repeat	IPR011990: Tetratricopeptide-like helical domain; IPR013026: Tetratricopeptide repeat-containing domain	58.021	84.163	140.46	0.519	0.802	0.368	0.04	10.083	6.473
sRNA26	TraesCS5D01G179900.2	4.5	NA	Protein FLUORESCENT IN BLUE LIGHT, chloroplastic	PF13424: Tetratricopeptide repeat	IPR011990: Tetratricopeptide-like helical domain; IPR013026: Tetratricopeptide repeat-containing domain	58.021	84.163	140.46	0.519	4.901	1.989	2.194	22.578	17.098
sRNA26	TraesCS5B01G172900.2	4.5	NA	Protein FLUORESCENT IN BLUE LIGHT, chloroplastic	PF13424: Tetratricopeptide repeat	IPR011990: Tetratricopeptide-like helical domain; IPR013026: Tetratricopeptide repeat-containing domain	58.021	84.163	140.46	0.519	1.787	1.01	0.481	9.615	6.068
sRNA26	TraesCS1D01G330700.3	4.5	NA	Outer envelope protein 80, chloroplastic	PF01103: Surface antigen	IPR000184: Bacterial surface antigen (D15)	58.021	84.163	140.46	0.519	0.732	0.657	0.322	2.141	1.301
sRNA26	TraesCS1D01G000500.1	4.5	0.720798	transmembrane protein, putative (DUF 3339)	PF11820: Protein of unknown function (DUF3339)	IPR021775: Protein of unknown function DUF3339	58.021	84.163	140.46	0.519	104.421	27.314	35.366	137.012	76.074
sRNA26	TraesCS6A01G293600.1	4.5	NA	U-box domain-containing protein	PF04564: U-box domain; PF00514: Armadillo/beta-catenin-like repeat	IPR000225: Armadillo; IPR003613: U box domain; IPR011989: Armadillo-like helical; IPR013083: Zinc finger, RING/FYVE/PHD-type; IPR016024: Armadillo-type fold	58.021	84.163	140.46	0.519	0.978	0.573	7.187	2.573	0.624
sRNA26	TraesCS6B01G365300.2	4.5	NA	Kinesin-like protein	PF00225: Kinesin motor domain	IPR001752: Kinesin motor domain; IPR019821: Kinesin motor domain, conserved site; IPR027417: P-loop containing nucleoside triphosphate hydrolase	58.021	84.163	140.46	0.519	12.274	5.719	2.67	24.182	6.013
sRNA343	TraesCS5A01G404800.1	4.5	NA	Cytochrome c biogenesis protein	PF05140: ResB-like family	IPR007816: ResB-like domain; IPR023494: Cytochrome c biogenesis protein Ccs1/CcsB	1.632	19.712	17.453	4.208	1.364	0.847	0.06	2.322	3.26
sRNA343	TraesCS5D01G414900.1	4.5	NA	Cytochrome c biogenesis protein	PF05140: ResB-like family	IPR007816: ResB-like domain; IPR023494: Cytochrome c biogenesis protein Ccs1/CcsB	1.632	19.712	17.453	4.208	2.688	2.034	0.379	3.565	6.109
sRNA343	TraesCS5B01G409700.1	4.5	NA	Cytochrome c biogenesis protein	PF05140: ResB-like family	IPR007816: ResB-like domain; IPR023494: Cytochrome c biogenesis protein Ccs1/CcsB	1.632	19.712	17.453	4.208	3.303	2.513	0.386	5.328	8.751
sRNA343	TraesCS3A01G121300.2	4.5	NA	Auxin-responsive protein	PF02309: AUX/IAA family	IPR000270: PB1 domain; IPR033389: AUX/IAA domain	1.632	19.712	17.453	4.208	16.333	5.412	2.025	18.052	16.534
sRNA347	TraesCS5A01G246700.1	4.5	NA	Kinase family protein	PF00069: Protein kinase domain	IPR000719: Protein kinase domain; IPR008271: Serine/threonine-protein kinase, active site; IPR011009: Protein kinase-like domain; IPR017441: Protein kinase, ATP binding site	1629.08	5270.08	11642.2	50.687	9.202	11.291	21.73	19.758	21.581
sRNA347	TraesCS5B01G243700.1	4.5	NA	Kinase family protein	PF00069: Protein kinase domain	IPR000719: Protein kinase domain; IPR008271: Serine/threonine-protein kinase, active site; IPR011009: Protein kinase-like domain; IPR017441: Protein kinase, ATP binding site	1629.08	5270.08	11642.2	50.687	13.104	10.008	36.786	24.683	22.161
sRNA347	TraesCS4B01G221100.1	4.5	NA	Tyrosine-specific transport protein	PF03222: Tryptophan/tyrosine permease family	IPR018227: Amino acid/polyamine transporter 2	1629.08	5270.08	11642.2	50.687	33.607	11.721	2.745	72.477	45.42
sRNA35	TraesCS5A01G547500.1	4.5	NA	Divalent metal cation transporter MntH	PF01566: Natural resistance-associated macrophage protein	IPR001046: NRAMP family	72.957	796.049	3129.17	7.532	19.563	4.507	3.846	35.971	23.46
sRNA371	TraesCS6D01G338500.1	4.5	NA	40S ribosomal protein			0	3.732	0.949	0.084	24.823	11.185	5.58	32.08	28.074
sRNA377	TraesCS2A01G037200.1	4.5	NA	dimethylallyl, adenosine tRNA methylthiotransferase			1901.15	2203.47	1892.69	16319.4	45.821	22.196	6.947	80.22	65.575
sRNA377	TraesCS2D01G036300.1	4.5	NA	dimethylallyl, adenosine tRNA methylthiotransferase			1901.15	2203.47	1892.69	16319.4	25.317	17.575	3.413	50.485	46.515
sRNA377	TraesCS1A01G144800.1	4.5	0.720867	Pentatricopeptide repeat-containing protein	PF02037: SAP domain	IPR003034: SAP domain; IPR011990: Tetratricopeptide-like helical domain	1901.15	2203.47	1892.69	16319.4	0.702	0.562	0.059	1.04	2.252
sRNA377	TraesCS1D01G143900.1	4.5	0.720867	Pentatricopeptide repeat-containing protein	PF02037: SAP domain	IPR003034: SAP domain; IPR011990: Tetratricopeptide-like helical domain	1901.15	2203.47	1892.69	16319.4	0.141	0.163	0	0.464	1.258
sRNA394	TraesCS1A01G030100.1	4.5	NA	NAD(P)-binding rossmann-fold protein	PF13460: NAD(P)H-binding	IPR016040: NAD(P)-binding domain	0	13.068	11.132	0.841	9.585	7.367	1.252	18.496	20.096
sRNA394	TraesCS4D01G300900.2	4.5	NA	Uroporphyrinogen III synthase	PF02602: Uroporphyrinogen-III synthase HemD	IPR003754: Tetrapyrrole biosynthesis, uroporphyrinogen III synthase	0	13.068	11.132	0.841	5.717	3.505	2.775	10.683	8.008
sRNA394	TraesCS1B01G084700.1	4.5	NA	Dihydrolipoyl dehydrogenase	PF07992: Pyridine nucleotide-disulphide oxidoreductase; PF02852: Pyridine nucleotide-disulphide oxidoreductase, dimerisation domain	IPR004099: Pyridine nucleotide-disulphide oxidoreductase, dimerisation domain; IPR006258: Dihydrolipoamide dehydrogenase; IPR012999: Pyridine nucleotide-disulphide oxidoreductase, class I, active site; IPR016156: FAD/NAD-linked reductase, dimerisation domain; IPR023753: FAD/NAD(P)-binding domain	0	13.068	11.132	0.841	5.682	1.795	1.864	25.37	5.429
sRNA394	TraesCS5A01G007900.1	4.5	NA	Lipoxygenase	PF01477: PLAT/LH2 domain; PF00305: Lipoxygenase	IPR001024: PLAT/LH2 domain; IPR001246: Lipoxygenase, plant; IPR013819: Lipoxygenase, C-terminal; IPR020833: Lipoxygenase, iron binding site; IPR020834: Lipoxygenase, conserved site; IPR027433: Lipoxygenase, domain 3	0	13.068	11.132	0.841	5.463	0.395	0.245	48.125	6.328
sRNA41	TraesCS3B01G234300.1	4.5	NA	Peptide deformylase	PF01327: Polypeptide deformylase	IPR023635: Peptide deformylase	25.078	22.141	4.57	0	3.389	2.026	0.17	7.377	4.895
sRNA438	TraesCS2D01G500600.1	4.5	0.770642	Glutamine synthetase	PF03951: Glutamine synthetase, beta-Grasp domain; PF00120: Glutamine synthetase, catalytic domain	IPR008146: Glutamine synthetase, catalytic domain; IPR008147: Glutamine synthetase, beta-Grasp domain; IPR014746: Glutamine synthetase/guanido kinase, catalytic domain; IPR027302: Glutamine synthetase, N-terminal conserved site; IPR027303: Glutamine synthetase, glycine-rich site	166.176	274.91	342.951	1993.45	24.748	9.24	0.272	70.088	21.04
sRNA438	TraesCS7D01G049000.3	4.5	NA	Oligopeptide transporter	PF03169: OPT oligopeptide transporter protein	IPR004648: Tetrapeptide transporter, OPT1/isp4; IPR004813: Oligopeptide transporter, OPT superfamily	166.176	274.91	342.951	1993.45	21.639	3.889	3.631	31.213	12.489
sRNA438	TraesCS5A01G356700.1	4.5	NA	Carboxyl-terminal-processing protease	PF13180: PDZ domain; PF03572: Peptidase family S41	IPR001478: PDZ domain; IPR004447: C-terminal-processing peptidase S41A; IPR005151: Tail specific protease; IPR029045: ClpP/crotonase-like domain	166.176	274.91	342.951	1993.45	13.472	7.96	4.664	25.197	18.251
sRNA438	TraesCS5D01G365600.2	4.5	NA	Carboxyl-terminal-processing protease	PF13180: PDZ domain; PF03572: Peptidase family S41	IPR001478: PDZ domain; IPR004447: C-terminal-processing peptidase S41A; IPR005151: Tail specific protease; IPR029045: ClpP/crotonase-like domain	166.176	274.91	342.951	1993.45	23.052	13.372	8.057	42.008	31.446
sRNA439	TraesCS7D01G049000.3	4.5	NA	Oligopeptide transporter	PF03169: OPT oligopeptide transporter protein	IPR004648: Tetrapeptide transporter, OPT1/isp4; IPR004813: Oligopeptide transporter, OPT superfamily	121.943	174.03	683.483	6687.07	21.639	3.889	3.631	31.213	12.489
sRNA439	TraesCS2D01G500600.1	4.5	0.766764	Glutamine synthetase	PF03951: Glutamine synthetase, beta-Grasp domain; PF00120: Glutamine synthetase, catalytic domain	IPR008146: Glutamine synthetase, catalytic domain; IPR008147: Glutamine synthetase, beta-Grasp domain; IPR014746: Glutamine synthetase/guanido kinase, catalytic domain; IPR027302: Glutamine synthetase, N-terminal conserved site; IPR027303: Glutamine synthetase, glycine-rich site	121.943	174.03	683.483	6687.07	24.748	9.24	0.272	70.088	21.04
sRNA508	TraesCS5A01G542000.1	4.5	0.713198	Aspartic proteinase Asp1	PF14543: Xylanase inhibitor N-terminal; PF14541: Xylanase inhibitor C-terminal	IPR001461: Aspartic peptidase A1 family; IPR001969: Aspartic peptidase, active site; IPR021109: Aspartic peptidase domain; IPR032799: Xylanase inhibitor, C-terminal; IPR032861: Xylanase inhibitor, N-terminal; IPR033121: Peptidase family A1 domain	1.632	3.329	1.126	0	2.054	1.994	1.569	2.182	5.178
sRNA508	TraesCS2A01G007500.1	4.5	NA	Major Facilitator Superfamily protein, expressed	PF00854: POT family	IPR000109: Proton-dependent oligopeptide transporter family; IPR018456: PTR2 family proton/oligopeptide symporter, conserved site; IPR020846: Major facilitator superfamily domain	1.632	3.329	1.126	0	18.698	5.633	0.74	28.156	16.98
sRNA508	TraesCS2B01G030000.1	4.5	0.703046	NBS-LRR resistance-like protein		IPR032675: Leucine-rich repeat domain, L domain-like	1.632	3.329	1.126	0	2.056	1.49	0	2.459	6.587
sRNA508	TraesCS4B01G043000.1	4.5	NA	Drug/metabolite transporter	PF00892: EamA-like transporter family	IPR000620: EamA domain	1.632	3.329	1.126	0	13.752	5.198	1.53	22.849	18.945
sRNA508	TraesCS2D01G317500.1	4.5	NA	Cryptochrome-1	PF00875: DNA photolyase; PF03441: FAD binding domain of DNA photolyase; PF12546: Blue/Ultraviolet sensing protein C terminal	IPR002081: Cryptochrome/DNA photolyase class 1; IPR005101: Cryptochrome/DNA photolyase, FAD-binding domain; IPR006050: DNA photolyase, N-terminal; IPR014134: Cryptochrome, plant; IPR014729: Rossmann-like alpha/beta/alpha sandwich fold; IPR018394: Cryptochrome/DNA photolyase class 1, conserved site, C-terminal; IPR020978: Cryptochrome C-terminal	1.632	3.329	1.126	0	39.727	21.694	12.455	55.977	53.271
sRNA526	TraesCS2A01G186900.1	4.5	0.705382	Glucan endo-1,3-beta-glucosidase, putative	PF00332: Glycosyl hydrolases family 17; PF07983: X8 domain	IPR000490: Glycoside hydrolase family 17; IPR012946: X8 domain; IPR017853: Glycoside hydrolase superfamily	263.354	237.16	110.85	832.226	0.253	0.054	0.045	0.874	0.06
sRNA526	TraesCS2B01G441100.1	4.5	NA	Potassium transporter	PF02705: K+ potassium transporter	IPR003855: Potassium transporter	263.354	237.16	110.85	832.226	4.191	1.714	2.834	7.018	4.976
sRNA53	TraesCS2D01G519500.2	4.5	0.83038	alpha/beta-Hydrolases superfamily protein	PF12697: Alpha/beta hydrolase family	IPR000073: Alpha/beta hydrolase fold-1; IPR000639: Epoxide hydrolase-like; IPR029058: Alpha/Beta hydrolase fold	14.768	12.902	22.911	0	22.024	12.023	5.311	58.721	39.035
sRNA53	TraesCS3D01G409400.1	4.5	NA	Leucine-rich repeat receptor-like protein kinase family protein	PF00560: Leucine Rich Repeat	IPR001611: Leucine-rich repeat; IPR032675: Leucine-rich repeat domain, L domain-like	14.768	12.902	22.911	0	1.056	0.523	1.081	1.84	2.391
sRNA53	TraesCS1B01G434100.2	4.5	NA	Subtilisin-like protease	PF05922: Peptidase inhibitor I9; PF00082: Subtilase family	IPR000209: Peptidase S8/S53 domain; IPR010259: Peptidase S8 propeptide/proteinase inhibitor I9; IPR015500: Peptidase S8, subtilisin-related; IPR023828: Peptidase S8, subtilisin, Ser-active site	14.768	12.902	22.911	0	4.253	0.423	0	26.358	9.66
sRNA533	TraesCS3B01G349800.1	4.5	0.754821	Rp1-like protein		IPR032675: Leucine-rich repeat domain, L domain-like	0	5.186	1.35	1.019	0.515	0.471	0.091	1.39	2.573
sRNA8	TraesCS1B01G243900.3	4.5	0.771429	Transducin/WD40 repeat-like superfamily protein	PF00400: WD domain, G-beta repeat	IPR001680: WD40 repeat; IPR011989: Armadillo-like helical; IPR015943: WD40/YVTN repeat-like-containing domain; IPR016024: Armadillo-type fold; IPR017986: WD40-repeat-containing domain	24.612	51.508	127.187	0.662	0.962	0.286	0.169	1.459	0.937
sRNA8	TraesCS6A01G392000.1	4.5	NA	Cytochrome P450, putative	PF00067: Cytochrome P450	IPR001128: Cytochrome P450; IPR002401: Cytochrome P450, E-class, group I; IPR017972: Cytochrome P450, conserved site	24.612	51.508	127.187	0.662	13.31	7.942	1.153	32.918	17.799
